CORRECTION

# Correction: MultiFAR: Multidimensional information fusion with attention-driven representation learning for student performance prediction

Mohd Fazil, Bader M. Albahlal

The corresponding author's email address ([mohdfazil.jmi@gmail.com](mailto:mohdfazil.jmi@gmail.com)) should not have been included. The correct email address for Mohd Fazil is [mfazil@imamu.edu.sa](mailto:mfazil@imamu.edu.sa).

## Reference

1. Fazil M, Albahlal BM. MultiFAR: Multidimensional information fusion with attention-driven representation learning for student performance prediction. PLoS One. 2025;20(10):e0333099. <https://doi.org/10.1371/journal.pone.0333099> PMID: [41134863](https://pubmed.ncbi.nlm.nih.gov/41134863/)

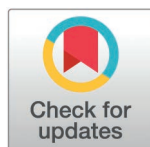

## OPEN ACCESS

**Citation:** Fazil M, Albahlal BM (2026) Correction: MultiFAR: Multidimensional information fusion with attention-driven representation learning for student performance prediction. PLoS One 21(1): e0340140. <https://doi.org/10.1371/journal.pone.0340140>

**Published:** January 2, 2026

**Copyright:** This is an open access article distributed under the terms of the [Creative Commons Attribution License](https://creativecommons.org/licenses/by/4.0/), which permits unrestricted use, distribution, and reproduction in any medium, provided the original author and source are credited.
